# Supplementary material for: Towards homogenous multiwell plate based pH sensors using a responsive triangulenium dye and an ATTO-647 reference dye
Source: Royal Society of Chemistry journal article supplement (doi:10.1039/d4ra07949c), 2025-01-01
Supplement: d4ra07949c3.pdf [file d4ra07949c3.pdf]

Overview of plate reader data:

| <b>Folder name</b> | <b>Contents</b>                                                                                                                         |
|--------------------|-----------------------------------------------------------------------------------------------------------------------------------------|
| Batch I            | Measurements of three pH sensor plates, made using parameters described in batch I (.csv-format).                                       |
| Batch II           | Measurements of three pH sensor plates, made using parameters described in batch II (.csv-format).                                      |
| Batch III          | Measurements of three pH sensor plates, made using parameters described in batch III (.csv-format).                                     |
| Batch IV           | Measurements of three pH sensor plates, made using parameters described in batch IV (.csv-format).                                      |
| Batch V            | Measurements of three pH sensor plates, made using parameters described in batch V (.csv-format).                                       |
| Batch VI           | Measurements of three pH sensor plates, made using parameters described in batch VI (.csv-format).                                      |
| Batch VII          | Measurements of three pH sensor plates, made using parameters described in batch VII (.csv-format).                                     |
| Batch VIII         | Single plate reader measurement of pH sensor test on Good's buffers. Plate made using parameters described in batch VIII (.csv-format). |
